# Supplementary material for: Chronic Rapamycin Treatment Causes Glucose Intolerance and Hyperlipidemia by Upregulating Hepatic Gluconeogenesis and Impairing Lipid Deposition in Adipose Tissue
Source: PubMed Central journal article supplement — Diabetes. 2010 Mar 18;59(6):1338–48. doi: 10.2337/db09-1324 (PMC2874694; doi:10.2337/db09-1324), 2010-03-18

**Supplemental table 1:** Antibodies used for immunoblotting

| Antibodies                                                        |                                                 | Provider                                       |
|-------------------------------------------------------------------|-------------------------------------------------|------------------------------------------------|
| <i>Primary antibodies</i>                                         | <i>Dilutions</i>                                |                                                |
| IRS-1 (H-165)                                                     | 2 µg/500 µg of protein for IP                   | Santa Cruz Biotechnology (Santa Cruz, CA, USA) |
| IRS-2 (A-19)                                                      | 2 µg/500 µg of protein for IP                   | Santa Cruz Biotechnology                       |
| Total Akt                                                         | 2 µg/500 µg of protein for IP and 1:1000 for WB | Santa Cruz Biotechnology                       |
| actin                                                             | 1:200                                           | Santa Cruz Biotechnology                       |
| PGC-1                                                             | 1:200                                           | Santa Cruz Biotechnology                       |
| CRTC2                                                             | 1:200                                           | Santa Cruz Biotechnology                       |
| histone H1                                                        | 1:200                                           | Santa Cruz Biotechnology                       |
| IRS-1                                                             | 1:1000                                          | Millipore (Nepean, ON, Canada)                 |
| IRS-2                                                             | 1:1000                                          | Millipore                                      |
| phospho-tyrosine (4G10)                                           | 1:5000                                          | Millipore                                      |
| S6 ribosomal protein                                              | 1:1000                                          | Cell Signaling Technology (Beverly, MA, USA)   |
| phospho-S6 ribosomal protein (Ser240/244)                         | 1:5000                                          | Cell Signaling Technology                      |
| phospho-Akt (Ser473)                                              | 1:1000                                          | Cell Signaling Technology                      |
| phospho-Akt (Thr308)                                              | 1:1000                                          | Cell Signaling Technology                      |
| CREB                                                              | 1:1000                                          | Cell Signaling Technology                      |
| Foxo1                                                             | 1:1000                                          | Cell Signaling Technology                      |
| phospho-GSK-3 (Ser21/9)                                           | 1:1000                                          | Cell Signaling Technology                      |
| <i>Secondary Antibodies</i>                                       |                                                 |                                                |
| anti-goat immunoglobulin G conjugated to horseradish peroxidase   | 1:10000                                         | Santa Cruz Biotechnology                       |
| anti-mouse immunoglobulin G conjugated to horseradish peroxidase  | 1:10000                                         | Cedarlane (Burlington, ON, Canada)             |
| anti-rabbit immunoglobulin G conjugated to horseradish peroxidase | 1:20000                                         | Cedarlane                                      |

**Supplemental table 2:** Primers Sequences for Real-Time PCR

| Rat             | Forward                   | Reverse                   |
|-----------------|---------------------------|---------------------------|
| LPL             | AACCTTTGTGGTGATCCATGGA    | CGAAATCCGCATCATCAGGA      |
| MGL             | CTAATTTACCTCTGATCCT       | AGGACAGAGTTGGTCACTTC      |
| FAT/CD36        | AGTAATCTCAAATAACTGTACGTCG | CTGCAAGCACAGTATGAAATCATAA |
| FATP1           | TCTGCGGCGCTTCGATGGCTAT    | TTGTGGGGGTCTGCAATGGC      |
| HSL             | CCTGCTGACCATCAACCGAC      | CCTCGATCTCCGTGATATTCCAGA  |
| ATGL            | CACTTTAGCTCCAAGGATGA      | TGGTTCAGTAGGCCATTCTC      |
| PPAR $\gamma$ 1 | ATATAAGGGACTCGAGGAGG      | TCAGCAACCATTGGGTCAG       |
| PPAR $\gamma$ 2 | GGTGAAACTCTGGGAGATCC      | TGAGGGAGTTTGAAGAGTCTTC    |
| PEPCK           | TGGGTGATGACATTGCCTGG      | TGGGTGATGACATTGCCTGG      |
| G6Pase          | CGACTCGCTACCTCCAAGTG      | TCCCTGGTCCAGTCTCACAG      |
| Lipin1          | AGCAGCCTCTTCTCCGCCTT      | GCTTCTCTCAGCAAGGGGA       |
| PGC-1 $\alpha$  | TCCTGTTACTATTATGAATCAAGCC | TCCTGTTACTATTATGAATCAAGCC |
| 36B4            | TAAAGACTGGAGACAAGGTG      | GTGTAGTCAGTCTCCACAG       |

**Supplemental table 3:** Effect of a 15-day rapamycin treatment on weight of various tissues.

|                        | <i>Control</i> | <i>Rapamycin</i>  |
|------------------------|----------------|-------------------|
| Absolute weight (g)    |                |                   |
| Heart                  | 0.882 ± 0.014  | 0.692 ± 0.017 *** |
| Liver                  | 10.12 ± 0.320  | 7.70 ± 0.292 ***  |
| EDL                    | 0.139 ± 0.002  | 0.112 ± 0.004 *** |
| Soleus                 | 0.133 ± 0.004  | 0.111 ± 0.005 **  |
| Epididymal fat         | 2.217 ± 0.182  | 1.363 ± 0.102 *   |
| Retroperitoneal fat    | 2.484 ± 0.374  | 0.836 ± 0.079 *** |
| Inguinal fat           | 3.720 ± 0.469  | 1.612 ± 0.058 *** |
| Brown fat              | 0.270 ± 0.023  | 0.173 ± 0.013 **  |
| Relative tissue weight |                |                   |
| Heart                  | 0.291 ± 0.005  | 0.306 ± 0.007     |
| Liver                  | 3.339 ± 0.072  | 3.411 ± 0.131     |
| EDL                    | 0.046 ± 0.001  | 0.049 ± 0.001     |
| Soleus                 | 0.044 ± 0.001  | 0.049 ± 0.003     |
| Epididymal fat         | 0.742 ± 0.052  | 0.621 ± 0.049     |
| Retroperitoneal fat    | 0.828 ± 0.111  | 0.382 ± 0.040 **  |
| Inguinal fat           | 1.235 ± 0.142  | 0.732 ± 0.019 *   |
| Brown fat              | 0.090 ± 0.006  | 0.078 ± 0.006     |

Weight data are average ± SEM (n=8 for control, n=6 for rapamycin). \*P≤0.05, \*\*P≤0.01, \*\*\*P≤0.001 versus control.

**Supplemental Figure 1- Chronic rapamycin treatment increases glucose production in FAO hepatoma cells.** FAO cells were treated with vehicle or rapamycin (25 nM) for 24h. A) Cells were serum deprived overnight with or without insulin (100 nM) and glucose production was assessed and expressed as fold over basal. B) Glucose production expressed as % of suppression by insulin. N = 5 independent experiments. \* $P \leq 0.05$  for CTRL/Basal vs CTRL/Insulin, † $P \leq 0.05$  for RAP/Basal vs RAP/Insulin, ‡ $P \leq 0.05$  for CTRL/Basal vs RAP/Basal and § $P \leq 0.05$  for CTRL/Insulin vs RAP/Insulin.

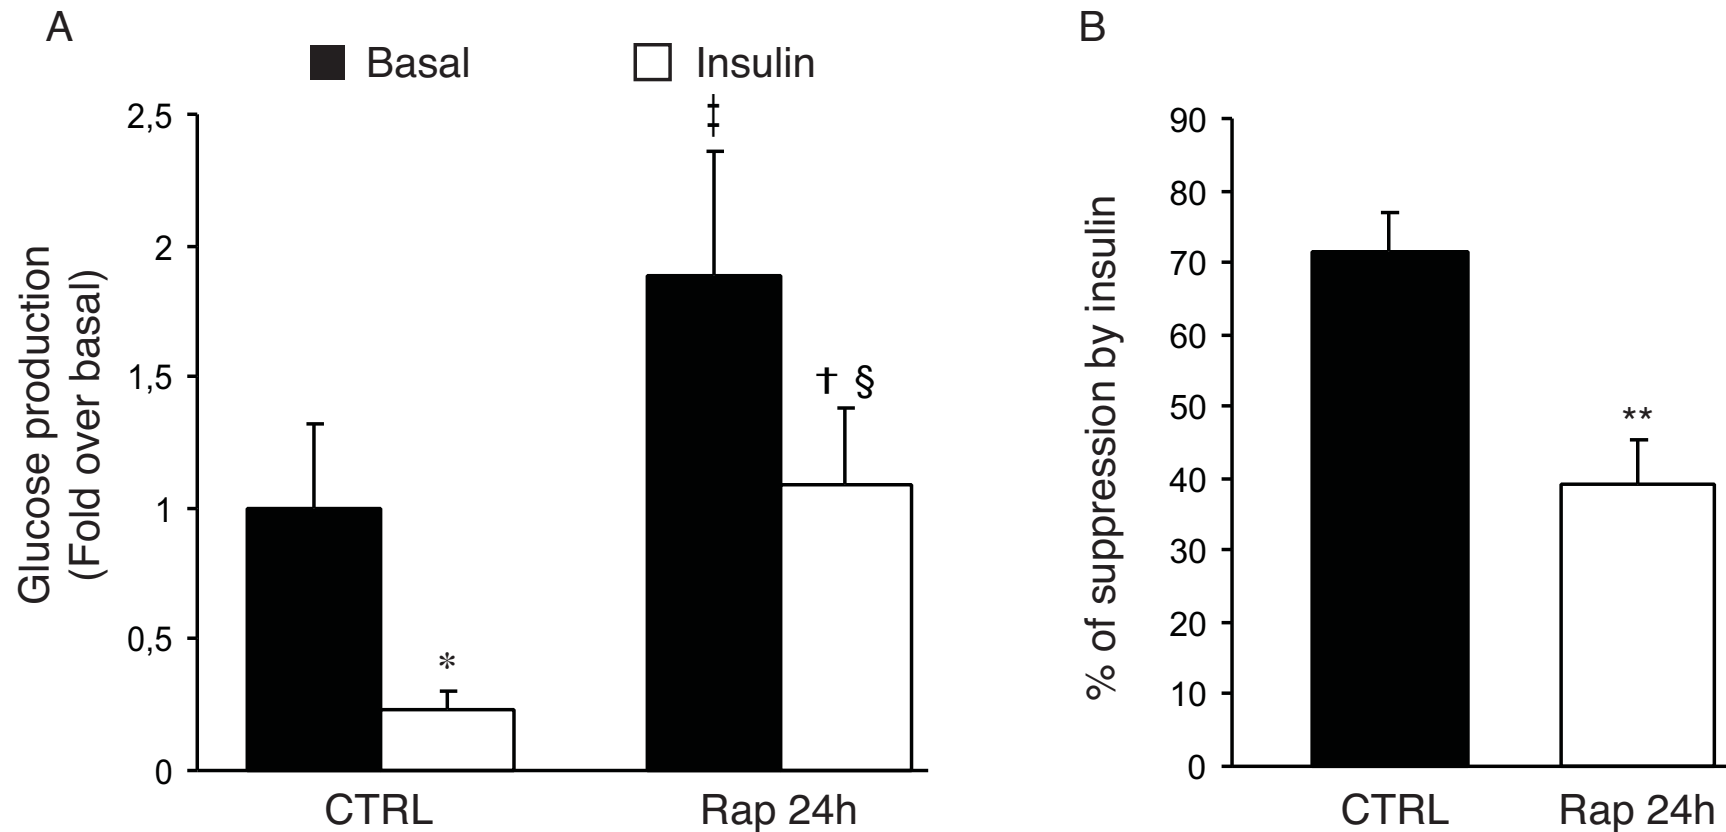

**Supplemental Figure 2- Two days of rapamycin treatment increase hepatic glucose production in rats.** Sprague-Dawley rats were treated with vehicle or rapamycin (2 mg/kg/day) for 2 days. Plasma glucose levels measured during a pyruvate tolerance test (PTT) on rats fasted for 12 h followed by 3 h of refeeding. The insert depicts the area under the curve (AUC) for each group. N = 5-6 animals. Black squares: CTRL; White squares: RAP. \*P<0.05.

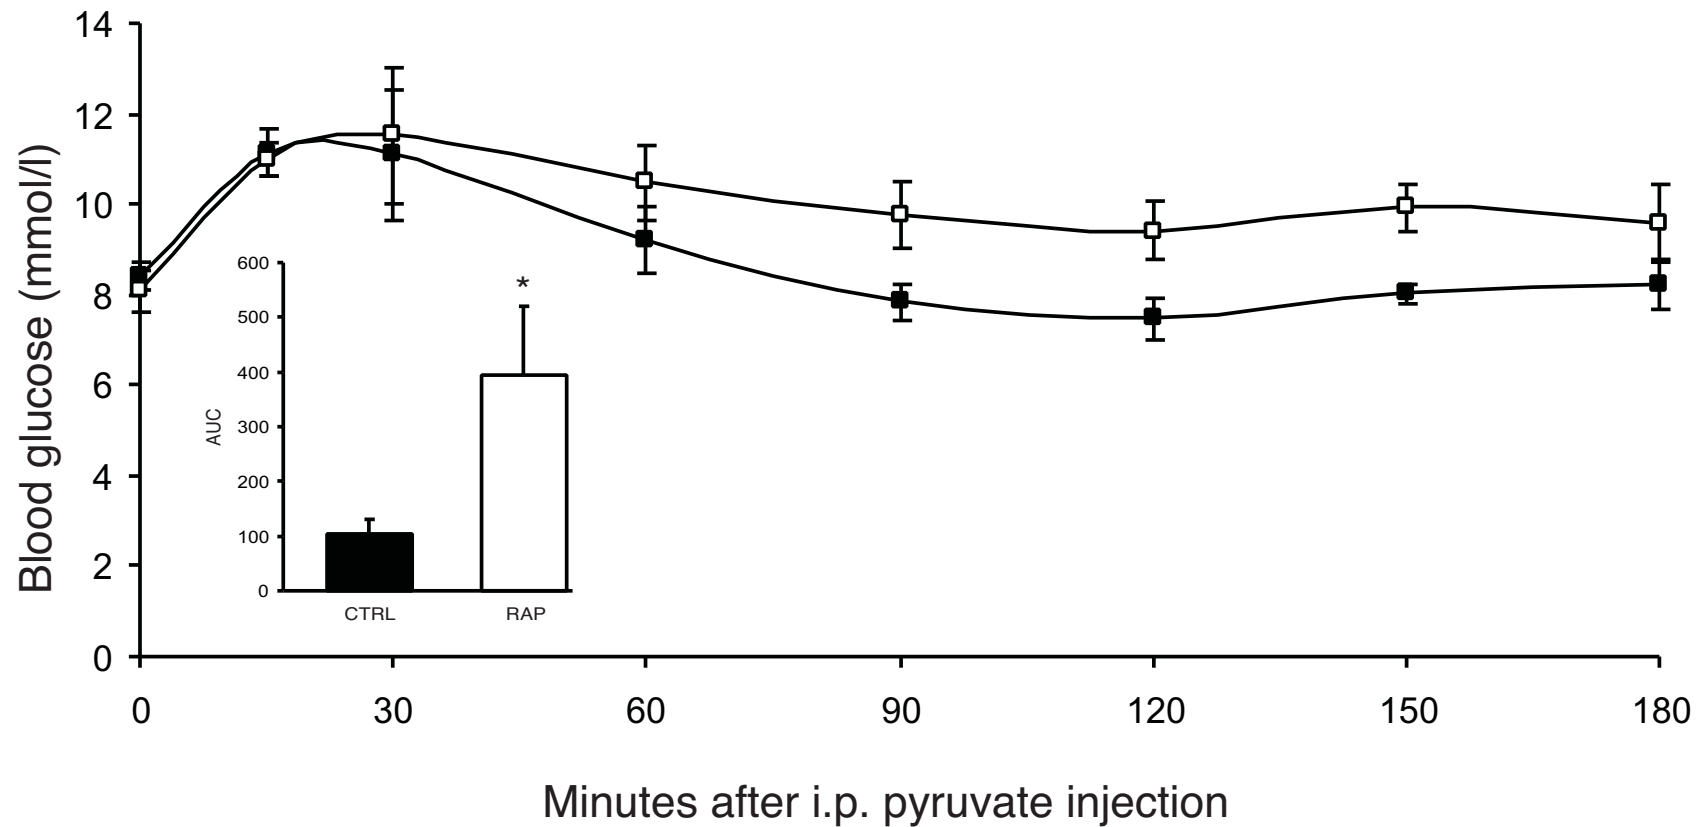

Supplement: supp_db09-1324_onlineappendix.pdf [file supp_db09-1324_onlineappendix.pdf]
